# Supplementary material
Source: Springer Nature journal article supplement (https://www.springermedizin.de/resource/supplementary/12933_2010_311_MOESM2_ESM.pdf/9540072)

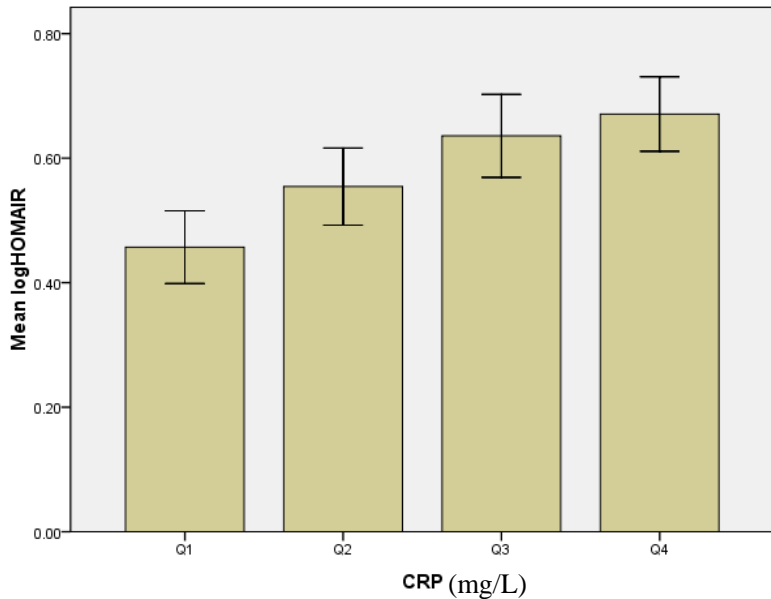

\* Q1-Q4: Quartiles of CRP

Supplement: MOESM2 [file 9540072]
